# Supplementary material for: Novel Erwinia persicina Infecting Phage Midgardsormr38 Within the Context of Temperate Erwinia Phages
Source: Front Microbiol. 2020 Jun 19;11:1245. doi: 10.3389/fmicb.2020.01245 (PMC7317114; doi:10.3389/fmicb.2020.01245)
Supplement: Supplementary file 3 [file Table_1.xlsx]

## Sheet: Sheet1
ORF	Strand	Start	End	Length (aa)	Function	Best BLASTp homology ( & acession number)	Identity * Query coverage (%)	E-value
1	+	10	537	176	terminase small subunit	>WP_049101925.1 terminase small subunit [Klebsiella oxytoca] WP_049101925.1	80.23*99.43	1.27e-101
2	+	530	1777	416	terminase large subunit	>WP_088732224.1 terminase [Citrobacter freundii] WP_088732224.1	94.22*99.76	0
3	+	1789	3138	450	portal protein	>WP_131863959.1 DUF1073 domain-containing protein [Biostraticola tofi] WP_131863959.1	79.53*95.56	0
4	+	3095	4045	317	head morphogenesis protein	>WP_113655414.1 phage head morphogenesis protein [Pantoea sp. 3_1284] WP_113655414.1	73.25*99.05	1.83e-171
5	+	4055	5329	425	prohead protease	>WP_121268679.1 hypothetical protein [Enterobacter sp. R1(2018)] WP_121268679.1	84.83*99.29	0
6	+	5329	5781	151	minor capsid protein	>WP_115058982.1 MULTISPECIES: hypothetical protein [Serratia] WP_115058982.1	91.16*97.35	5.72e-93
7	+	5796	6893	366	major capsid protein	>WP_121268391.1 hypothetical protein [Enterobacter sp. R1(2018)] WP_121268391.1	90.69*99.73	0
8	+	6904	7194	97	hypothetical protein	>WP_088168658.1 hypothetical protein [Klebsiella michiganensis] WP_088168658.1	75.26*98.97	5.99e-43
9	+	7252	7650	133	virion structural protein	>WP_049852131.1 hypothetical protein [Pantoea sp. RIT-PI-b] WP_049852131.1	90.0*97.74	7.57e-81
10	+	7647	7817	57	hypothetical protein	>WP_118663646.1 50S ribosomal protein L13 [Erwinia persicina] WP_118663646.1	90.91*96.49	1.15e-29
11	+	7819	8166	116	hypothetical protein	>WP_118663648.1 hypothetical protein [Erwinia persicina] WP_118663648.1	97.39*99.14	1.83e-74
12	+	8168	8536	123	putative tail component	>WP_137244702.1 HK97 gp10 family phage protein [Pantoea agglomerans] WP_137244702.1	91.8*99.19	3.88e-77
13	+	8533	8916	128	hypothetical protein	>KMV67659.1 hypothetical protein AI28_12500 [bacteria symbiont BFo1 of Frankliniella occidentalis] KMV67659.1	96.06*99.22	1.2e-84
14	+	8941	9681	247	Ig domain containing protein	>WP_048780806.1 Ig domain-containing protein [Pantoea vagans] WP_048780806.1	90.65*99.6	8.22e-161
15	+	9741	10424	228	hypothetical protein	>KMV67661.1 hypothetical protein AI28_12510 [bacteria symbiont BFo1 of Frankliniella occidentalis] KMV67661.1	93.69*97.37	1.16e-155
16	-	10785	10441	115	Mnt repressor	>WP_050160345.1 Arc family DNA-binding protein [Yersinia enterocolitica] WP_050160345.1	57.27*95.65	2.5e-36
17	+	10897	11061	55	Arc family DNA-binding protein	>WP_114675801.1 Arc family DNA-binding protein [Citrobacter freundii] WP_114675801.1	85.19*98.18	1.14e-23
18	+	11134	12024	297	Ant1 antirepressor protein	>WP_053091484.1 hypothetical protein [Serratia marcescens] WP_053091484.1	70.55*91.58	7.63e-141
19	+	12043	12777	245	Ant2 antirepressor protein	>WP_136546118.1 DNA-binding protein [Pantoea sp. R102] WP_136546118.1	83.61*99.59	5.92e-150
20	+	12909	13247	113	hypothetical protein	>WP_097759331.1 hypothetical protein [Escherichia coli] WP_097759331.1	68.75*99.12	1.32e-54
21	+	13259	13807	183	hypothetical protein	>WP_050088925.1 hypothetical protein [Yersinia intermedia] WP_050088925.1	51.1*98.91	2.47e-59
22	+	13869	17279	1137	tail tape measure protein	>WP_110330418.1 tape measure protein [Pantoea sp. JKS000250] WP_110330418.1	79.21*99.91	0
23	+	17327	17548	74	hypothetica protein	>WP_145562706.1 hypothetical protein [Yersinia aldovae] WP_145562706.1	72.6*98.65	9.74e-32
24	+	17608	17958	117	minor tail protein M	>KMV67668.1 tail protein [bacteria symbiont BFo1 of Frankliniella occidentalis] KMV67668.1	93.97*99.15	5.15e-76
25	+	17955	18659	235	minor tail protein L	>KMV67669.1 tail protein [bacteria symbiont BFo1 of Frankliniella occidentalis] KMV67669.1	99.57*99.57	3.04e-172
26	+	18659	19384	242	tail assembly protein K	>KYP84451.1 tail protein [bacteria symbiont BFo1 of Frankliniella occidentalis] KYP84451.1	94.19*99.59	5.78e-169
27	+	19327	19857	177	tail assembly protein I	>KYP84450.1 lambda tail assembly I [bacteria symbiont BFo1 of Frankliniella occidentalis] KYP84450.1	98.3*99.44	5.65e-125
28	+	19866	23012	1049	host specificity protein J	>KMV67672.1 hypothetical protein AI28_12570 [bacteria symbiont BFo1 of Frankliniella occidentalis] KMV67672.1	98.57*99.9	0
29	+	23014	23325	104	hypothetical protein	>WP_072277504.1 hypothetical protein [Erwinia persicina] WP_072277504.1	79.21*97.12	1.59e-54
30	+	23325	23996	224	hypothetical protein	>KMV67673.1 hypothetical protein AI28_12575 [bacteria symbiont BFo1 of Frankliniella occidentalis] KMV67673.1	98.66*99.55	8.94e-160
31	+	24080	24313	78	cor protein	>WP_072277505.1 cor protein [Erwinia persicina] WP_072277505.1	77.92*98.72	9.78e-36
32	+	24374	25666	431	tail protein	>KMV67674.1 hypothetical protein AI28_12580 [bacteria symbiont BFo1 of Frankliniella occidentalis] KMV67674.1	69.8*99.77	0
33	+	25964	26206	81	DNA polymerase V	>WP_099753979.1 DNA polymerase V [Erwinia sp. OLMDLW33] WP_099753979.1	96.25*98.77	6.57e-50
34	+	26206	26529	108	repressor protein CI	>WP_099753943.1 hypothetical protein [Erwinia sp. OLMDLW33] WP_099753943.1	90.65*99.07	1.45e-64
35	-	27711	26539	391	integrase	>RAP72782.1 putative prophage CPS-53 integrase [Candidatus Erwinia dacicola] RAP72782.1	98.72*99.74	0
36	-	27967	27791	59	hypothetical protein	- -	-	-
37	-	28160	27960	67	excisionase	>RAP73019.1 response regulator [Candidatus Erwinia dacicola] RAP73019.1	100.0*98.51	3.48e-42
38	-	28473	28264	70	hypothetical protein	>AXH43545.1 hypothetical protein MZUP2_270 [Erwinia phage vB_EhrS_59] AXH43545.1	86.57*95.71	6.77e-35
39	-	28694	28470	75	hypothetical protein	>KMV70393.1 hypothetical protein AI28_22885 [bacteria symbiont BFo1 of Frankliniella occidentalis] KMV70393.1	98.63*97.33	7.9e-46
40	-	28922	28704	73	hypothetical protein	>KMV67299.1 hypothetical protein AI28_20390 [bacteria symbiont BFo1 of Frankliniella occidentalis] KMV67299.1	93.06*98.63	1.57e-41
41	-	29465	29037	143	hypothetical protein	>WP_135726346.1 hypothetical protein [Klebsiella pneumoniae] WP_135726346.1	42.54*90.21	2.75e-17
42	-	29719	29462	86	hypothetical protein	>WP_107223350.1 hypothetical protein [Kluyvera sp. Nf5] WP_107223350.1	66.67*94.19	6.97e-33
43	-	29991	29716	92	hypothetical protein	>KYV68770.1 dTDP-6-deoxy-L-hexose 3-O-methyltransferase [Escherichia coli] KYV68770.1	66.67*52.17	2.34e-11
44	-	30656	29988	223	hypothetical protein	>WP_118663600.1 hypothetical protein [Erwinia persicina] WP_118663600.1	54.17*68.16	8.81e-38
45	-	30877	30653	75	hypothetical protein	>WP_105536516.1 hypothetical protein [Cronobacter sakazakii] WP_105536516.1	62.86*93.33	6e-24
46	-	31350	30874	159	hypothetical protein	>WP_112347606.1 hypothetical protein [Serratia quinivorans] WP_112347606.1	50.54*57.23	7.07e-22
47	-	32071	31388	228	exonuclease	>KYP84500.1 exonuclease [bacteria symbiont BFo1 of Frankliniella occidentalis] KYP84500.1	96.48*99.56	1.64e-165
48	-	33000	32068	311	recombinase	>RAP72980.1 recombinase, phage RecT family protein [Candidatus Erwinia dacicola] RAP72980.1	98.06*99.68	0
49	-	33302	33000	101	hypothetical protein	>RAP72985.1 hypothetical protein ACZ87_00190 [Candidatus Erwinia dacicola] RAP72985.1	94.0*99.01	2.52e-63
50	-	33415	33299	39	hypothetical protein	>RAP72979.1 hypothetical protein ACZ87_00189 [Candidatus Erwinia dacicola] RAP72979.1	97.37*97.44	4e-18
51	-	33549	33412	46	protease FtsH-inhibitory lysogeny factor CIII	>WP_072215464.1 protease FtsH-inhibitory lysogeny factor CIII [Type-F symbiont of Plautia stali] WP_072215464.1	84.44*97.83	1.68e-19
52	-	34538	33567	324	cell envelope biogenesis protein	>WP_061718622.1 hypothetical protein [Enterobacter ludwigii] WP_061718622.1	75.85*99.69	8.6e-130
53	-	34884	34723	54	hypothetical protein	- -	-	-
54	-	35227	35000	76	hypothetical protein	>WP_040076798.1 hypothetical protein [Enterobacteriaceae bacterium ATCC 29904] WP_040076798.1	59.46*97.37	1.41e-23
55	-	35540	35280	87	hypothetical protein	>WP_139182616.1 hypothetical protein [Serratia nematodiphila] WP_139182616.1	52.94*97.7	4.29e-23
56	-	35871	35548	108	regulatory protein	>WP_044242108.1 hypothetical protein [Pantoea stewartii] WP_044242108.1	63.3*97.22	2.51e-35
57	-	36081	35905	59	hypothetical protein	- -	-	-
58	-	37279	36395	295	P63C domain containing protein	>WP_045328216.1 MULTISPECIES: hypothetical protein [Enterobacter cloacae complex] WP_045328216.1	73.45*98.31	2.99e-166
59	-	38094	37441	218	LexA family transcriptional repressor	>WP_118663613.1 helix-turn-helix domain-containing protein [Erwinia persicina] WP_118663613.1	94.47*99.54	1.26e-155
60	+	38205	38414	70	XRE family transcriptional regulator	>WP_118663614.1 helix-turn-helix transcriptional regulator [Erwinia persicina] WP_118663614.1	95.65*98.57	1.22e-40
61	+	38523	38816	98	regulatory protein CII	>WP_064739426.1 hypothetical protein [Enterobacter ludwigii] WP_064739426.1	87.63*98.98	9.02e-53
62	+	38835	38981	49	protein of unknown function DUF2740	>WP_097421170.1 DUF2740 domain-containing protein [Escherichia coli] WP_097421170.1	60.42*97.96	1.15e-11
63	+	38974	39789	272	replication protein O	>KMV67773.1 DNA replication protein [bacteria symbiont BFo1 of Frankliniella occidentalis] KMV67773.1	63.84*99.63	3.52e-118
64	+	39792	41135	448	replicative DNA helicase	>KMV67774.1 DNA helicase [bacteria symbiont BFo1 of Frankliniella occidentalis] KMV67774.1	98.88*99.78	0
65	+	41140	41265	42	hypothetical protein	- -	-	-
66	+	41262	41414	51	hypothetical protein	- -	-	-
67	+	41411	41635	75	hypothetical protein	>KYP84747.1 hypothetical protein WB66_11055 [bacteria symbiont BFo1 of Frankliniella occidentalis] KYP84747.1	94.59*98.67	2.97e-45
68	+	41637	41870	78	protein of unknown function DUF3850	>YP_002003774.1 unknown product [Enterobacteria phage EcoDS1] YP_002003774.1	64.86*94.87	6.94e-27
69	+	41870	42226	119	putative NinX protein	>WP_115116571.1 DUF2591 domain-containing protein [Serratia marcescens] WP_115116571.1	57.76*94.96	1.13e-39
70	+	42226	42528	101	hypothetical protein	>WP_113655434.1 MULTISPECIES: hypothetical protein [Pantoea] WP_113655434.1	66.0*99.01	3.8e-37
71	+	42528	42620	31	hypothetical protein	- -	-	-
72	+	42620	42886	89	protein of unknown function DUF4752	>WP_118663620.1 DUF4752 family protein [Erwinia persicina] WP_118663620.1	87.06*95.51	3.05e-48
73	+	42883	43065	61	hypothetical protein	>RAP73004.1 hypothetical protein ACZ87_00174 [Candidatus Erwinia dacicola] RAP73004.1	98.33*98.36	6.02e-35
74	+	43068	43517	150	protein of unknown function DUF1367	>KMV67634.1 hypothetical protein AI28_12365 [bacteria symbiont BFo1 of Frankliniella occidentalis] KMV67634.1	98.66*99.33	7.63e-108
75	+	43527	43793	89	MarR family transcriptional regulator	>KMV67635.1 hypothetical protein AI28_12370 [bacteria symbiont BFo1 of Frankliniella occidentalis] KMV67635.1	96.59*98.88	2.87e-56
76	+	43790	43966	59	NinE family protein	>RAP73012.1 hypothetical protein ACZ87_00171 [Candidatus Erwinia dacicola] RAP73012.1	94.83*98.31	4.29e-30
77	+	43963	44106	48	NinF family protein	>WP_075180562.1 hypothetical protein [Pantoea sp. 1.19] WP_075180562.1	80.0*93.75	9.59e-18
78	+	44099	44392	98	protein of unknown function DUF1364	>KMV67638.1 hypothetical protein AI28_12385 [bacteria symbiont BFo1 of Frankliniella occidentalis] KMV67638.1	100.0*98.98	4.3e-65
79	+	44385	44747	121	holliday junction resolvase	>KMV67639.1 Holliday junction resolvase [bacteria symbiont BFo1 of Frankliniella occidentalis] KMV67639.1	96.67*99.17	9.72e-81
80	+	44744	44863	40	YlcG family protein	>WP_118663630.1 YlcG family protein [Erwinia persicina] WP_118663630.1	87.18*97.5	1.13e-15
81	+	44860	45882	341	phosphoadenosine phosphosulfate reductase family protein	>EAU9153826.1 hypothetical protein [Salmonella enterica] EAU9153826.1	58.54*96.19	4.35e-133
82	+	45879	45986	36	hypothetical protein	- -	-	-
83	+	45983	46750	256	antitermination protein Q	>AXH43514.1 antitermination protein Q [Erwinia phage vB_EhrS_49] AXH43514.1	78.04*99.61	2.63e-146
84	-	47115	46960	52	hypothetical protein	>ABU78294.1 hypothetical protein ESA_03065 [Cronobacter sakazakii ATCC BAA-894] ABU78294.1	70.59*98.08	1.27e-21
85	-	47361	47155	69	hypothetical protein	>WP_130961498.1 hypothetical protein [Hafnia paralvei] WP_130961498.1	70.59*98.55	2.69e-28
86	+	47487	47663	59	hypothetical protein	- -	-	-
87	+	47696	48025	110	holin	>KMV67789.1 holin [bacteria symbiont BFo1 of Frankliniella occidentalis] KMV67789.1	100.0*99.09	4.3e-73
88	+	48018	48650	211	endolysin	>KMV67790.1 endolysin [bacteria symbiont BFo1 of Frankliniella occidentalis] KMV67790.1	91.87*99.05	3.53e-142
89	+	48638	49054	139	Rz lytic protein	>KMV67791.1 hypothetical protein AI28_08160 [bacteria symbiont BFo1 of Frankliniella occidentalis] KMV67791.1	96.38*99.28	1.01e-90
90	+	48909	49190	94	Rz1 lytic protein	>WP_109463508.1 peptidase [Pectobacterium parmentieri] WP_109463508.1	69.62*84.04	2.88e-30
91	+	49353	49940	196	Rha family transcriptional regulator	>WP_040265438.1 Rha family transcriptional regulator [Serratia symbiotica] WP_040265438.1	82.38*98.47	5.08e-116
92	+	49937	50146	70	hypothetical protein	>WP_017346128.1 hypothetical protein [Pantoea sp. A4] WP_017346128.1	89.86*98.57	5.69e-40
93	-	50470	50330	47	hypothetical protein	>SAG05621.1 Uncharacterised protein [Enterobacter cloacae] SAG05621.1	95.65*97.87	1.4e-22
